## Correction

## Correction for: High expression of CCNB1 driven by ncRNAs is associated with a poor prognosis and tumor immune infiltration in breast cancer

Hongtao Fu<sup>1</sup>, Kun Li<sup>2</sup>, Shui Wang<sup>1</sup>, Yuming Li<sup>3</sup>

<sup>1</sup>Department of Breast Surgery, Jiangsu Province Hospital, The First Hospital Affiliated Hospital with Nanjing Medical University, Nanjing 210029, China

<sup>2</sup>Department of Emergency, Changsha Central Hospital, The Affiliated Changsha Central Hospital of Hengyang Medical School, University of South China, Changsha 410004, China

<sup>3</sup>Department of Traditional Chinese Medicine and Western Medicine, Hunan Cancer Hospital, The Affiliated Cancer Hospital of Xiangya School of Medicine, Central South University, Changsha 410006, China

**Correspondence to:** Yuming Li; **email:** [liyuming@hnca.org.cn](mailto:liyuming@hnca.org.cn)

**Keywords:** biomarker, bioinformatics analysis

**Original article:** [Aging \(Albany NY\) 2022; 14: pp 6780–6795](#)

PMID: [36040381](#)

PMCID: [PMC9467392](#)

doi: [10.18632/aging.204253](#)

**This article has been corrected:** The authors corrected the order of the affiliations and correct order is listed below:

**Hongtao Fu<sup>1,2</sup>, Kun Li<sup>3</sup>, Shui Wang<sup>2</sup>, Yuming Li<sup>1</sup>**

<sup>1</sup>Department of Traditional Chinese Medicine and Western Medicine, Hunan Cancer Hospital, The Affiliated Cancer Hospital of Xiangya School of Medicine, Central South University, Changsha 410006, China

<sup>2</sup>Department of Breast Surgery, Jiangsu Province Hospital, The First Hospital Affiliated Hospital with Nanjing Medical University, Nanjing 210029, China

<sup>3</sup>Department of Emergency, Changsha Central Hospital, The Affiliated Changsha Central Hospital of Hengyang Medical School, University of South China, Changsha 410004, China
